# Supplementary material for: High-continuity genome assembly of the jellyfish Chrysaora quinquecirrha
Source: PubMed Central journal article supplement — Zool Res. 2021 Jan 18;42(1):130–4. doi: 10.24272/j.issn.2095-8137.2020.258 (PMC7840447; doi:10.24272/j.issn.2095-8137.2020.258), 2021-01-18
Supplement: zr-42-1-130-S1.pdf [file zr-42-1-130-S1.pdf]

## Supplementary Tables and Figures

Supplementary Table S1 Scaffold statistics of *C. quinquecirrha*

| Scaffold ID                                 | Length (bp) | Scaffold ID | Length (bp) |
|---------------------------------------------|-------------|-------------|-------------|
| Scaf1                                       | 5 149 220   | Scaf27      | 5 598 669   |
| Scaf2                                       | 7 906 628   | Scaf28      | 4 391 500   |
| Scaf3                                       | 1 085 000   | Scaf29      | 15 257 941  |
| Scaf4                                       | 3 825 607   | Scaf30      | 2 805 058   |
| Scaf5                                       | 1 519 393   | Scaf31      | 8 698 500   |
| Scaf6                                       | 7 036 558   | Scaf32      | 10 155 000  |
| Scaf7                                       | 1 985 107   | Scaf33      | 1 828 394   |
| Scaf8                                       | 1 547 226   | Scaf34      | 1 710 361   |
| Scaf9                                       | 2 312 428   | Scaf35      | 2 941 639   |
| Scaf10                                      | 9 889 076   | Scaf36      | 3 049 000   |
| Scaf11                                      | 1 379 500   | Scaf37      | 2 870 879   |
| Scaf12                                      | 3 004 805   | Scaf38      | 3 810 444   |
| Scaf13                                      | 6 503 500   | Scaf39      | 2 897 894   |
| Scaf14                                      | 8 499 568   | Scaf40      | 1 295 083   |
| Scaf15                                      | 2 729 391   | Scaf41      | 4 840 932   |
| Scaf16                                      | 7 844 609   | Scaf42      | 5 879 406   |
| Scaf17                                      | 4 613 000   | Scaf43      | 1 090 000   |
| Scaf18                                      | 4 418 028   | Scaf44      | 1 579 293   |
| Scaf19                                      | 1 462 328   | Scaf45      | 3 446 000   |
| Scaf20                                      | 1 160 172   | Scaf46      | 5 709 418   |
| Scaf21                                      | 2 355 614   | Scaf47      | 9 020 731   |
| Scaf22                                      | 5 017 578   | Scaf48      | 5 888 604   |
| Scaf23                                      | 6 294 754   | Scaf49      | 1 293 500   |
| Scaf24                                      | 1 377 740   | Scaf50      | 2 412 000   |
| Scaf25                                      | 5 640 661   | Scaf51      | 2 133 000   |
| Scaf26                                      | 11 530 542  |             |             |
| Total length of long scaffolds (bp)         |             | 226 691 279 |             |
| Total genome size (bp)                      |             | 337 419 359 |             |
| Ratio of long scaffolds in whole genome (%) |             | 67.18%      |             |

**Supplementary Table S2 Genome QC results of two genome versions**

| Term                                                       | Hi-C version | Contig-version     |
|------------------------------------------------------------|--------------|--------------------|
|                                                            | (this study) | (Xia et al., 2020) |
| Number of scaffolds                                        | 1 882        | 2 496              |
| Total size of scaffolds                                    | 337 419 359  | 336 819 409        |
| Total scaffold length as percentage of assumed genome size | 104.789      | 104.602            |
| useful amount of scaffold sequences ( $\geq 25$ K nt)      | 325 818 692  | 322 354 749        |
| % of estimated genome that is useful                       | 101.186      | 100.110            |
| Longest scaffold                                           | 15 257 941   | 4 015 784          |
| Shortest scaffold                                          | 527          | 1 873              |
| Number of scaffolds > 1K nt                                | 1 857        | 2 496              |
| Number of scaffolds > 10K nt                               | 822          | 1 691              |
| Number of scaffolds > 100K nt                              | 278          | 516                |
| Number of scaffolds > 1M nt                                | 51           | 76                 |
| Number of scaffolds > 10M nt                               | 3            | 0                  |
| N50                                                        | 3 825 607    | 733 647            |
| L50                                                        | 24           | 125                |
| NG50                                                       | 4 418 028    | 770 816            |
| LG50                                                       | 22           | 115                |
| %A                                                         | 29.628       | 29.635             |
| %C                                                         | 17.786       | 17.791             |
| %G                                                         | 17.843       | 17.901             |
| %T                                                         | 29.678       | 29.776             |
| Total Number of Ns                                         | 17 091 689   | 16 491 739         |
| %N                                                         | 5.065        | 4.896              |

**Supplementary Table S3 Statistics of BUSCO scores of two genome versions**

| Term                                | Contig-version     |         | Hi-C version |         |
|-------------------------------------|--------------------|---------|--------------|---------|
|                                     | (Xia et al., 2020) |         | (this study) |         |
| Library                             | Eukaryota          | Metazoa | Eukaryota    | Metazoa |
| Complete BUSCOs (C)                 | 226                | 701     | 240          | 718     |
| Complete and single-copy BUSCOs (S) | 195                | 585     | 210          | 605     |
| Complete and duplicated BUSCOs (D)  | 31                 | 116     | 30           | 113     |
| Fragmented BUSCOs (F)               | 32                 | 73      | 26           | 70      |
| Missing BUSCOs (M)                  | 45                 | 204     | 37           | 190     |
| Total BUSCO groups searched         | 303                | 978     | 303          | 978     |
| Summarize                           | 74.60%             | 71.70%  | 79.20%       | 73.50%  |

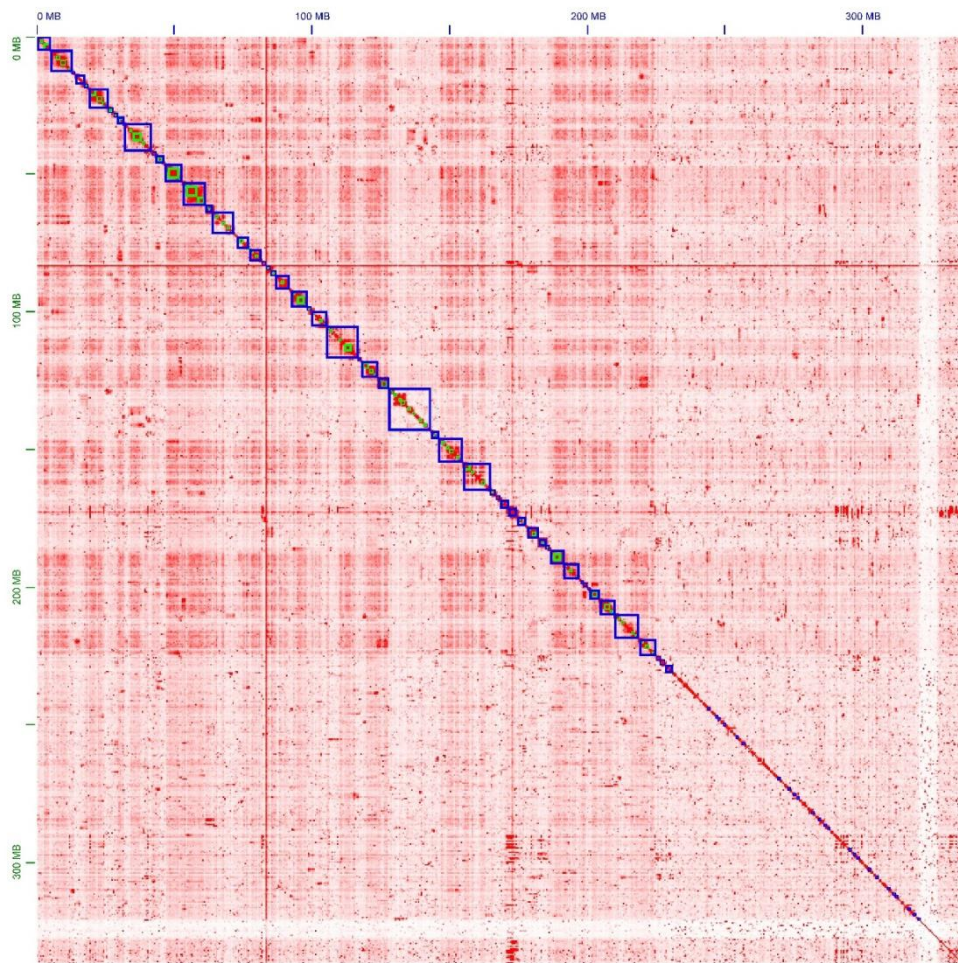

**Supplementary Figure S1 Heatmap of interactions of all scaffolds**

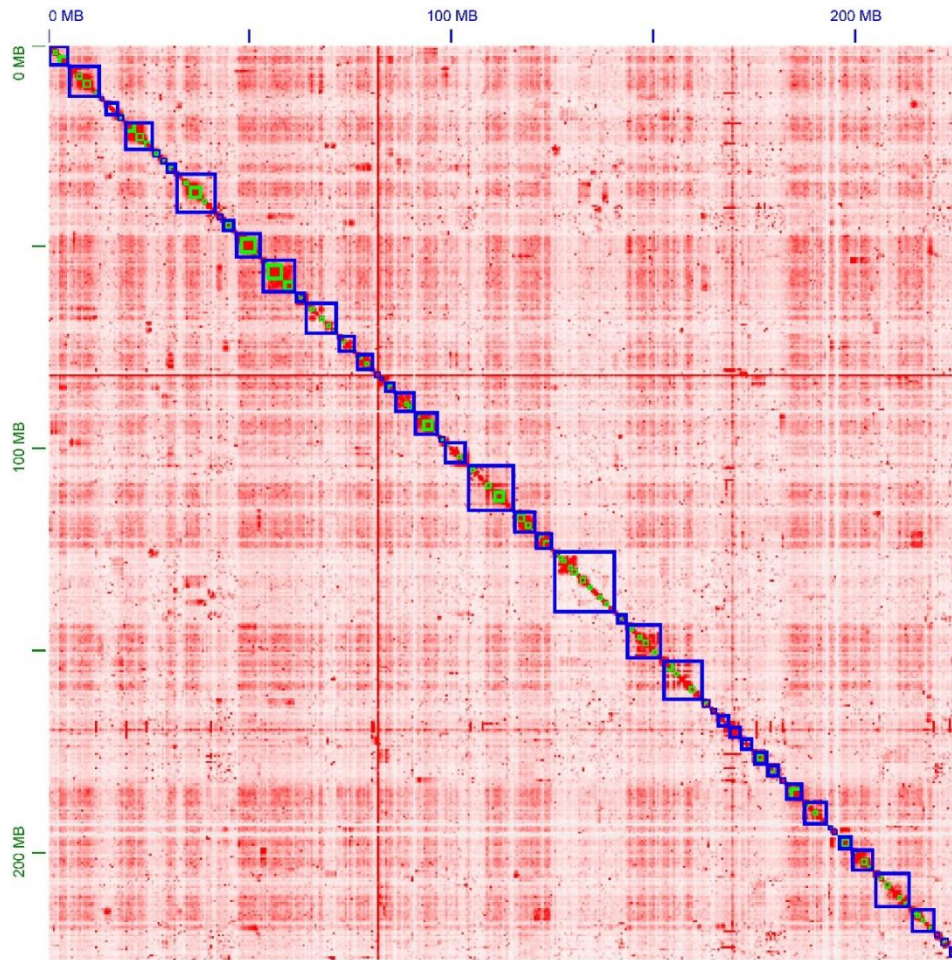

**Supplementary Figure S2 Heatmap of interactions of 51 super-scaffolds**
